# Supplementary material for: Dynamic landscape of protein occupancy across the Escherichia coli chromosome
Source: PubMed Central journal article supplement (PMC8282354; doi:10.1371/journal.pbio.3001306), 2021-06-25
Supplement: pbio.3001306.s011.pdf [file pbio.3001306.s011.pdf]

| <b>Genomic Region</b> | <b>Mean</b> | <b>Standard deviation</b> | <b>Skew</b> | <b>vs. Coding No TF</b> |
|-----------------------|-------------|---------------------------|-------------|-------------------------|
| Noncoding, No TF      | 0.80        | 2.08                      | 0.38        | <0.005                  |
| Noncoding, TF site    | 1.06        | 2.31                      | 0.65        | <0.005                  |
| Coding, No TF         | 0.17        | 1.26                      | -0.03       | --                      |
| Coding, TF Site       | 0.34        | 1.69                      | 0.20        | 0.075                   |
| (Standard normal)     | 0.00        | 1.00                      | 0.00        | --                      |
