# Supplementary material for: Dynamic landscape of protein occupancy across the Escherichia coli chromosome
Source: PubMed Central journal article supplement (PMC8282354; doi:10.1371/journal.pbio.3001306), 2021-06-25
Supplement: pbio.3001306.s013.pdf [file pbio.3001306.s013.pdf]

| Identified protein | Accession Number            | Molecular Weight | Total Spectrum Count |
|--------------------|-----------------------------|------------------|----------------------|
| UlaR               | tr C3SFV2 C3SFV2_ECOLX      | 28 kDa           | 16                   |
| YieP               | tr E2QHU3 E2QHU3_ECOLX      | 26 kDa           | 9                    |
| RpsC               | tr C3SQX2 C3SQX2_ECOLX      | 26 kDa           | 7                    |
| RpoC               | tr C3SIA2 C3SIA2_ECOLX      | 155 kDa          | 11                   |
| RpoB               | tr E2QJ13 E2QJ13_ECOLX      | 151 kDa          | 7                    |
| RuvA               | tr C3T5R2 C3T5R2_ECOLX      | 22 kDa           | 10                   |
| FliA               | tr C3SDE6 C3SDE6_ECOLX      | 28 kDa           | 6                    |
| RpoA               | tr C3SR67 C3SR67_ECOLX      | 37 kDa           | 7                    |
| RpsD               | tr C3SR62 C3SR62_ECOLX      | 23 kDa           | 3                    |
| RdgC               | tr E2QGD8 E2QGD8_ECOLX      | 34 kDa           | 3                    |
| UvrA               | tr C3SHF7 C3SHF7_ECOLX      | 104 kDa          | 5                    |
| CysB               | tr C3TC57 C3TC57_ECOLX      | 36 kDa           | 5                    |
| FabR               | tr E2QIZ8 E2QIZ8_ECOLX      | 24 kDa           | 4                    |
| GroL               | tr Q548M1 Q548M1_ECOLX      | 57 kDa           | 3                    |
| IhfB               | tr Q14F22 Q14F22_ECOLX      | 11 kDa           | 4                    |
| RplC               | tr C3SQU2 C3SQU2_ECOLX      | 22 kDa           | 2                    |
| AccB               | tr C3SRL7 C3SRL7_ECOLX      | 17 kDa           | 4                    |
| AmiA               | tr E2QPR8 E2QPR8_ECOLX      | 31 kDa           | 3                    |
| IhfA               | tr Q14F23 Q14F23_ECOLX      | 11 kDa           | 2                    |
| Ppx                | tr C3T027 C3T027_ECOLX      | 58 kDa           | 2                    |
| RplB               | tr C3SQV7 C3SQV7_ECOLX      | 30 kDa           | 2                    |
| RpoE               | tr Q0P6M2 Q0P6M2_ECOLX      | 22 kDa           | 2                    |
| FabZ               | tr C3TPH7 C3TPH7_ECOLX      | 17 kDa           | 3                    |
| PoiA               | tr E2QI51 E2QI51_ECOLX      | 103 kDa          | 2                    |
| TufB               | tr E2QFJ4 E2QFJ4_ECOLX (+1) | 43 kDa           | 2                    |
