# Supplementary material for: Dynamic landscape of protein occupancy across the Escherichia coli chromosome
Source: PubMed Central journal article supplement (PMC8282354; doi:10.1371/journal.pbio.3001306), 2021-06-25
Supplement: pbio.3001306.s014.pdf [file pbio.3001306.s014.pdf]

| Feature                            | Median difference | p value | q value | Reference                      |
|------------------------------------|-------------------|---------|---------|--------------------------------|
| Transcriptional propensity         | -1.009            | 0.001   | 0.001   | [1]                            |
| Supercoiling density               | -0.256            | 0.487   | 0.487   | [2]                            |
| Normalized Tn5 integration density | 4.605             | 0.001   | 0.001   | [1]                            |
| Fis binding                        | -1.060            | 0.001   | 0.001   | [3]                            |
| H-NS binding                       | 12.068            | 0.001   | 0.001   | [3]                            |
| HU binding                         | -0.289            | 0.042   | 0.048   | [4]                            |
| LRP binding                        | 0.462             | 0.091   | 0.097   | [5]                            |
| SeqA binding                       | -0.255            | 0.003   | 0.004   | [6]                            |
| Dam sites                          | -0.674            | 0.001   | 0.001   | Sequence analysis              |
| AT content                         | 1.855             | 0.001   | 0.001   | Sequence analysis              |
| RNA                                | -0.682            | 0.001   | 0.001   | Present study                  |
| MGW                                | -0.084            | 0.001   | 0.001   | Calculated using DNASHapeR [7] |
| HeIT                               | 0.071             | 0.001   | 0.001   |                                |
| ProT                               | -0.169            | 0.001   | 0.001   |                                |
| Roll                               | -0.086            | 0.001   | 0.001   |                                |

## References

1. Scholz SA, Diao R, Wolfe MB, Fivenson EM, Lin XN, Freddolino PL. High-Resolution Mapping of the Escherichia coli Chromosome Reveals Positions of High and Low Transcription. *Cell Syst.* 2019;8: 212–225.e9.
2. Lal A, Dhar A, Trostel A, Kouzine F, Seshasayee ASN, Adhya S. Genome scale patterns of supercoiling in a bacterial chromosome. *Nat Commun.* 2016;7: 11055.
3. Kahramanoglou C, Seshasayee ASN, Prieto AI, Ibberson D, Schmidt S, Zimmermann J, et al. Direct and indirect effects of H-NS and Fis on global gene expression control in Escherichia coli. *Nucleic Acids Research.* 2011. pp. 2073–2091. doi:10.1093/nar/gkq934
4. Prieto AI, Kahramanoglou C, Ali RM, Fraser GM, Seshasayee ASN, Luscombe NM.

Genomic analysis of DNA binding and gene regulation by homologous nucleoid-associated proteins IHF and HU in *Escherichia coli* K12. *Nucleic Acids Res.* 2012;40: 3524–3537.

5. Kroner GM, Wolfe MB, Freddolino PL. *Escherichia coli* Lrp regulates one-third of the genome via direct, cooperative, and indirect routes. *J Bacteriol.* 2018. doi:10.1128/JB.00411-18
6. Joshi MC, Magnan D, Montminy TP, Lies M, Stepankiw N, Bates D. Regulation of sister chromosome cohesion by the replication fork tracking protein SeqA. *PLoS Genet.* 2013;9: e1003673.
7. Chiu T-P, Comoglio F, Zhou T, Yang L, Paro R, Rohs R. DNASHapeR: an R/Bioconductor package for DNA shape prediction and feature encoding. *Bioinformatics.* 2016;32: 1211–1213.
